# Supplementary material
Source: MDPI journal article supplement (https://www.mdpi.com/2412-382X/7/3/29)
Supplement: s1 [file s1]

Archive with 1 entries (1 files):
- qubs-2548659-supplementary.pdf
